# Supplementary material for: Coordination of stress signals by the lysine methyltransferase SMYD2 promotes pancreatic cancer
Source: PubMed Central journal article supplement (PMC4826394; doi:10.1101/gad.275529.115), 2016-04-01

**A**

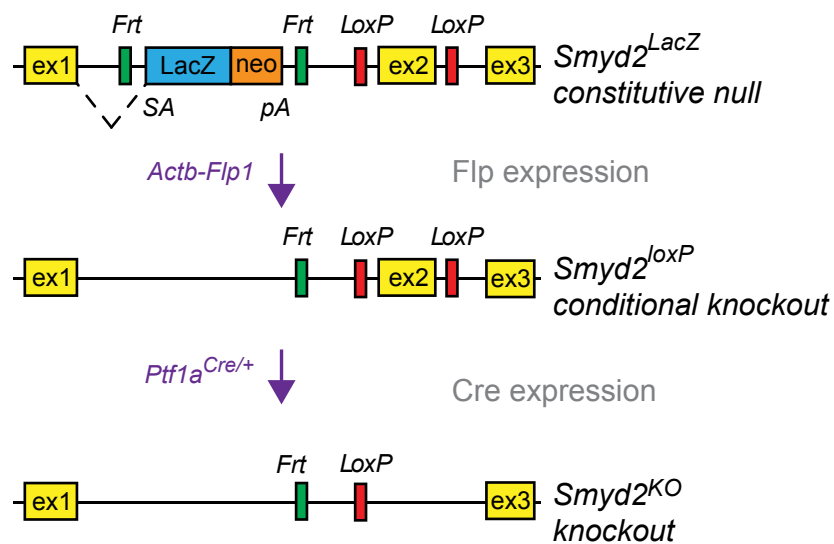

**B**

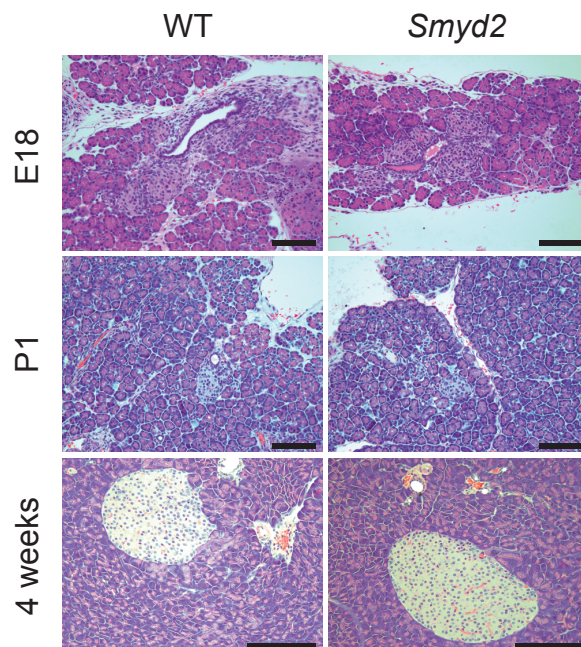

**C**

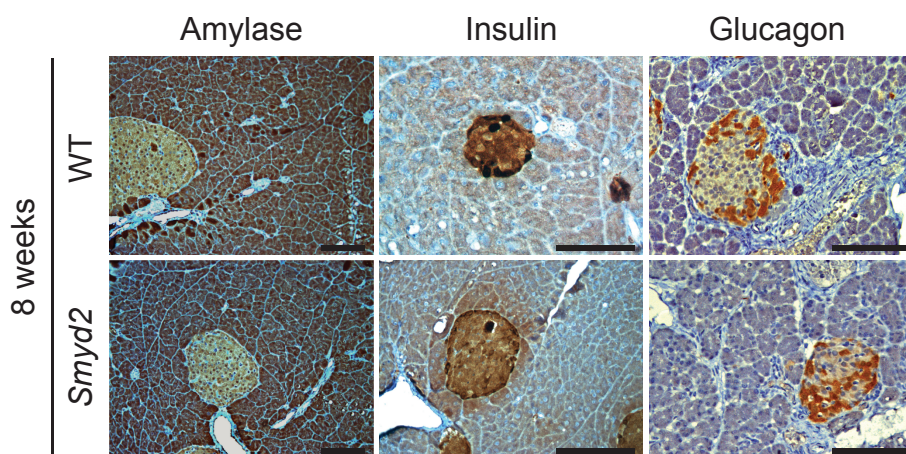

**D**

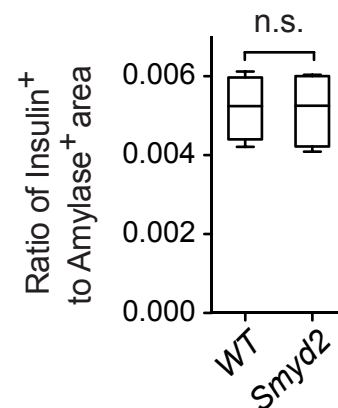

**E**

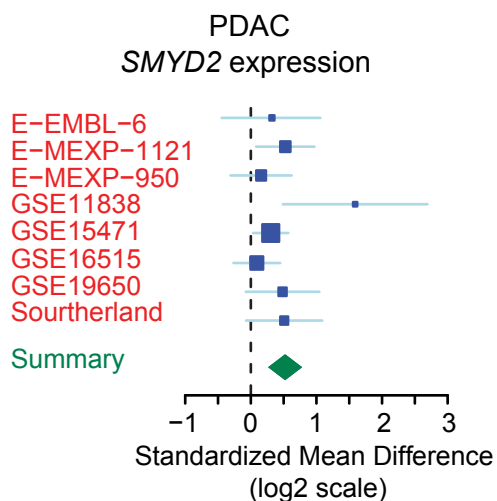

**F**

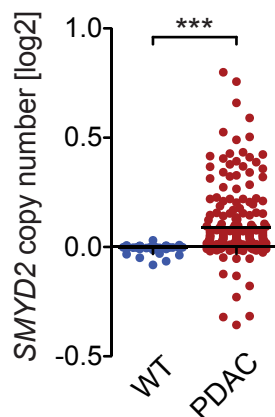

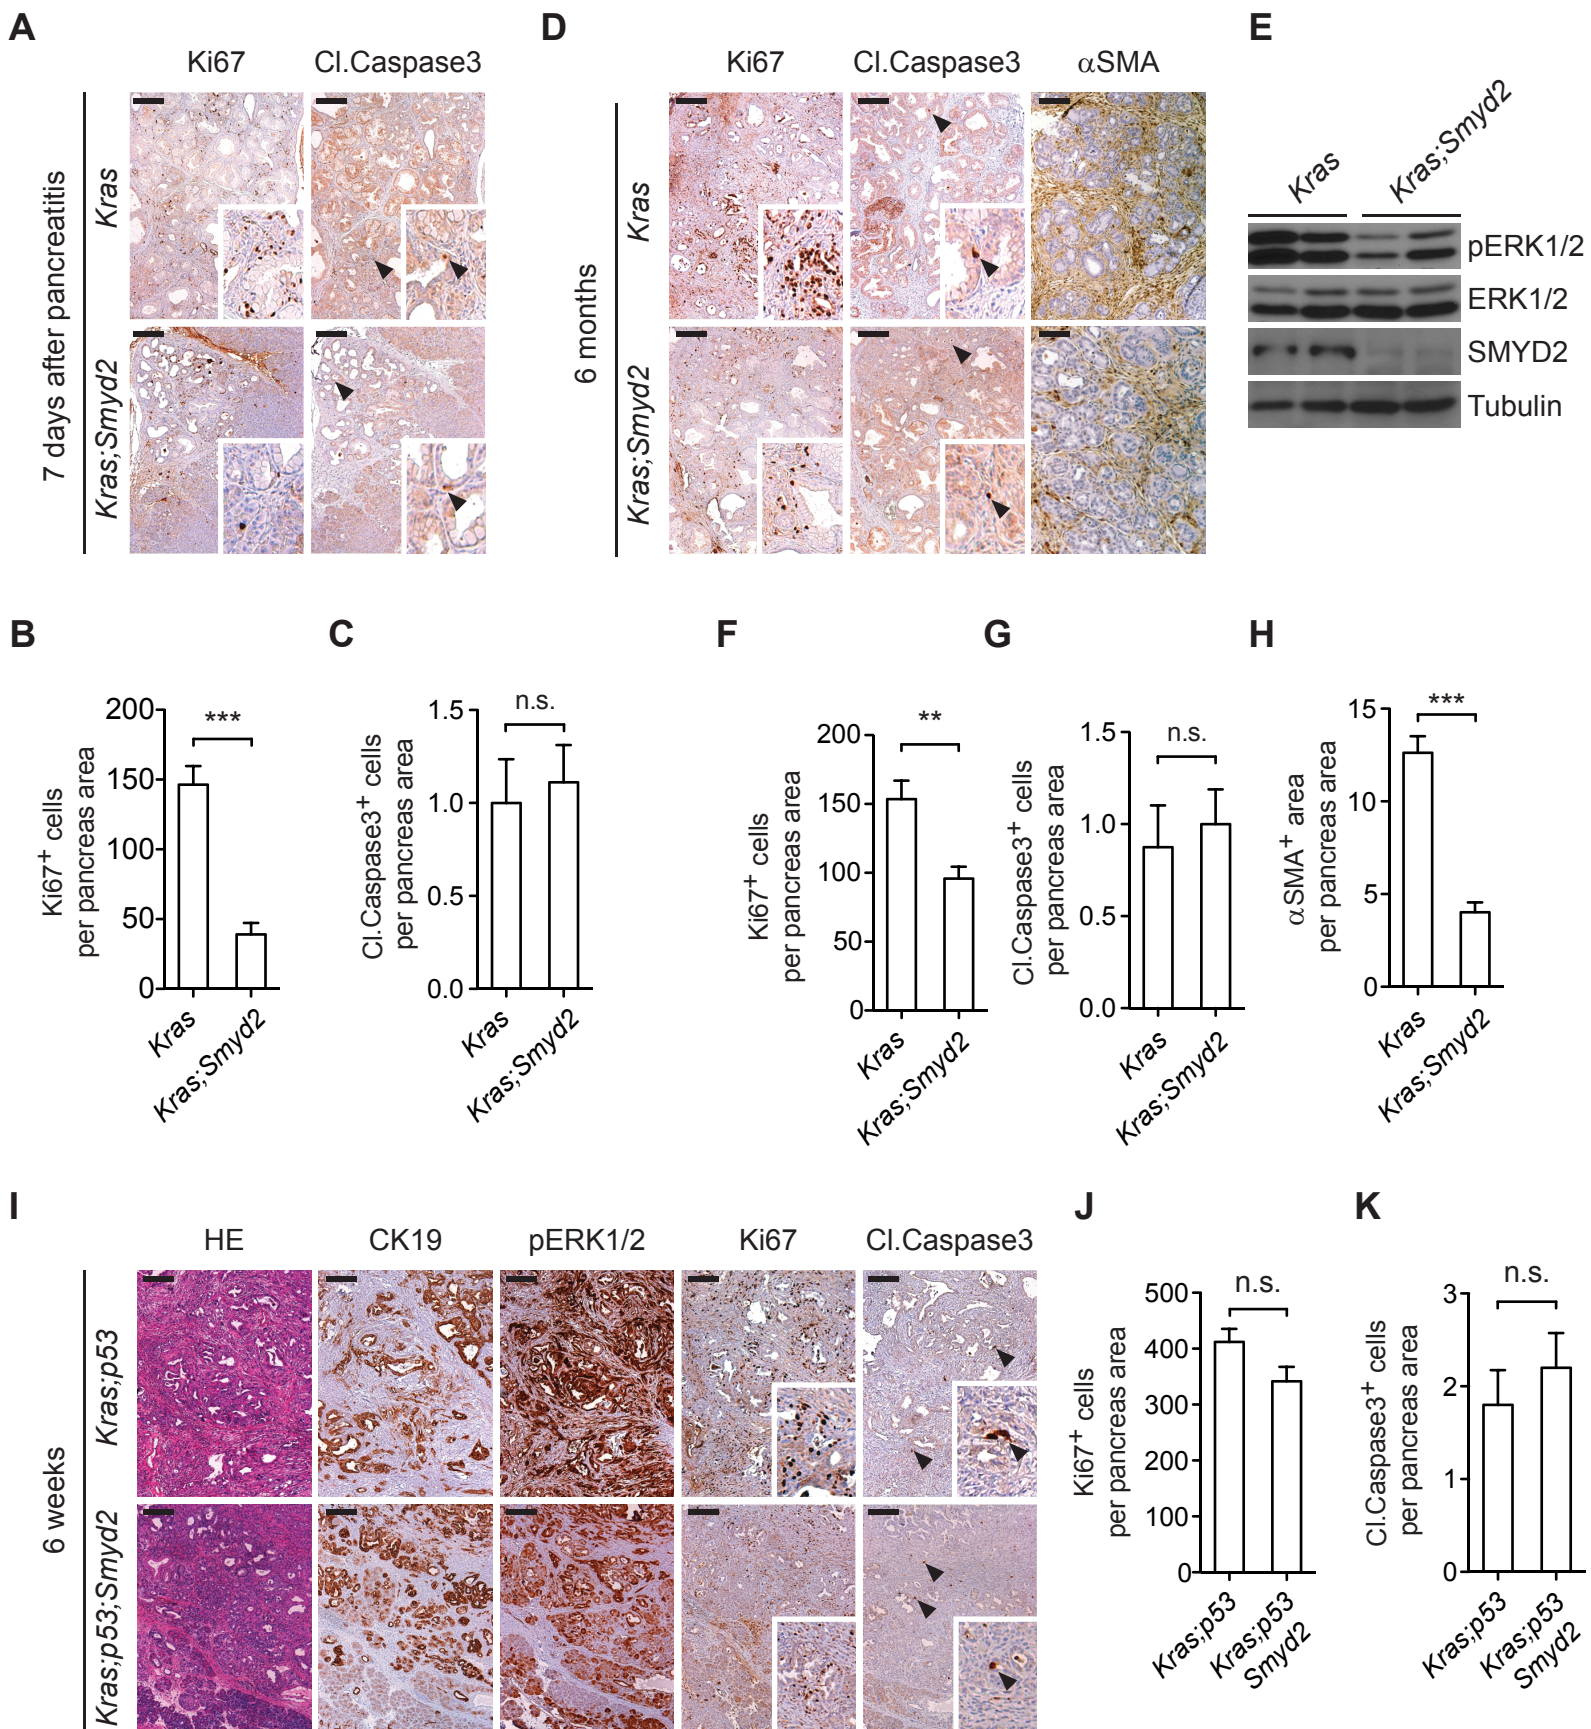



**A**

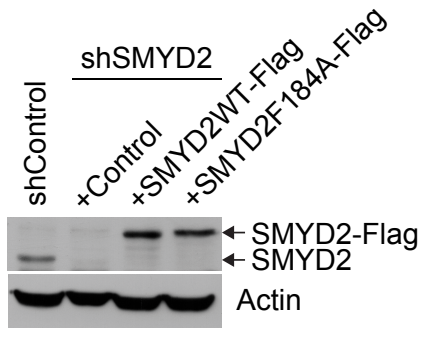

**B**

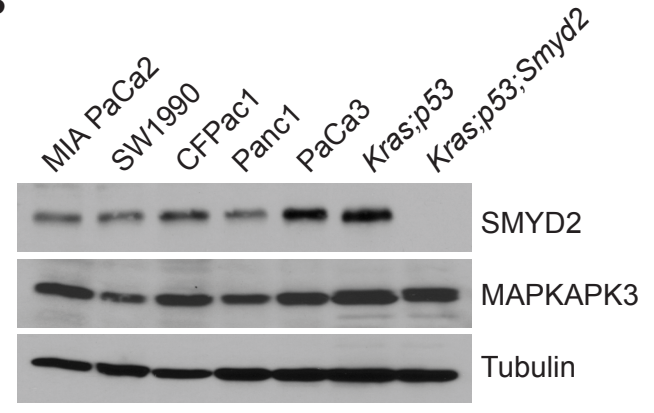

**C**

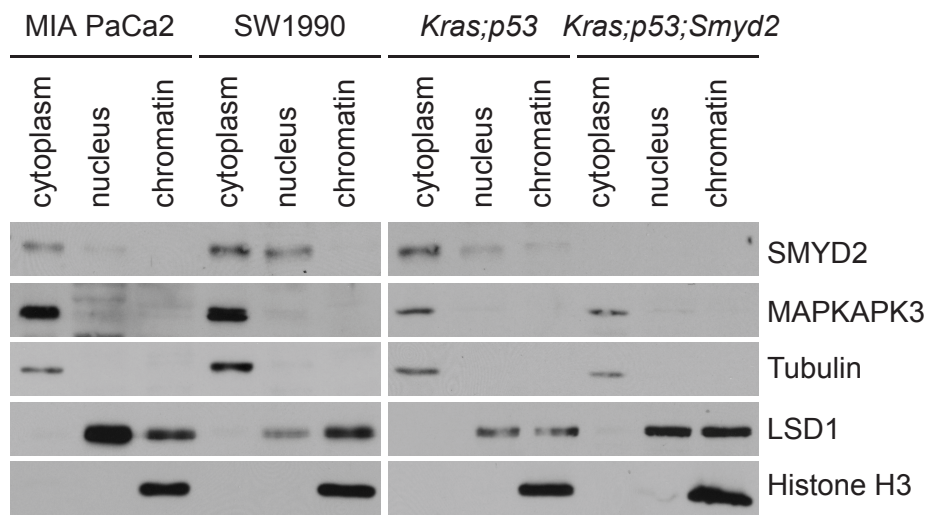

**A**

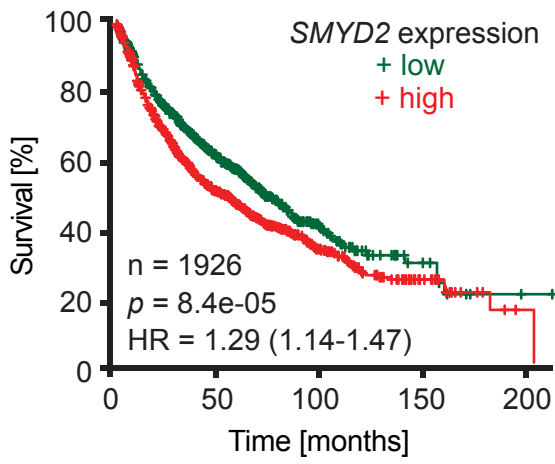

**B**

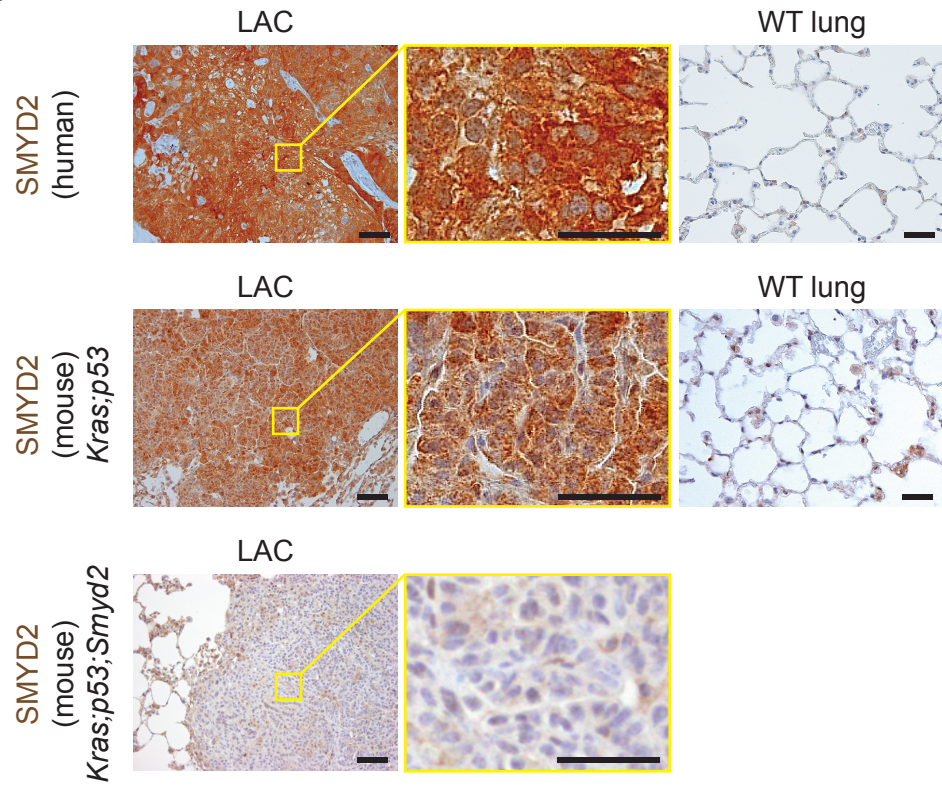

**C**

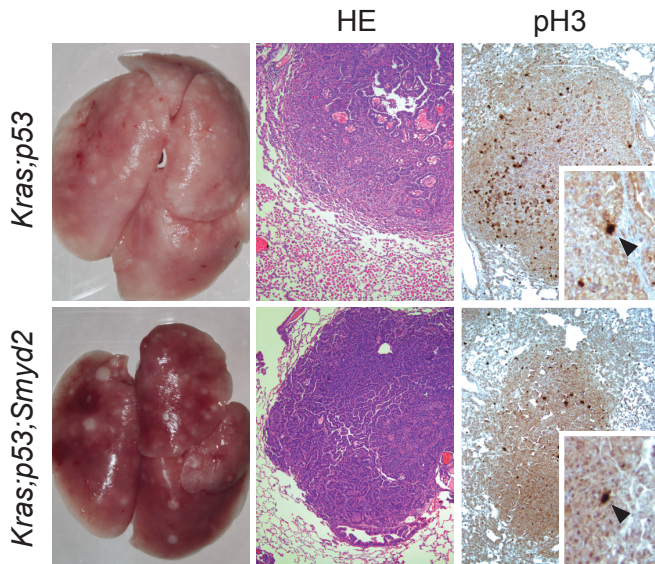

**D**

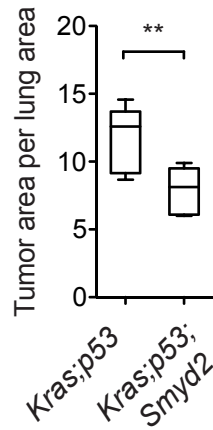

**E**

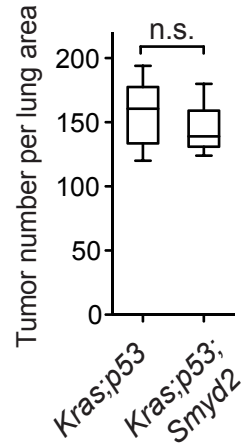

**F**

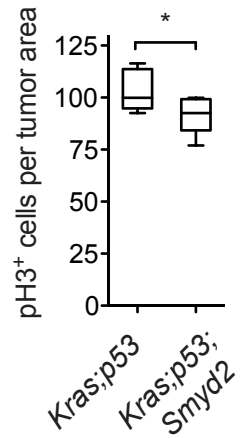

**G**

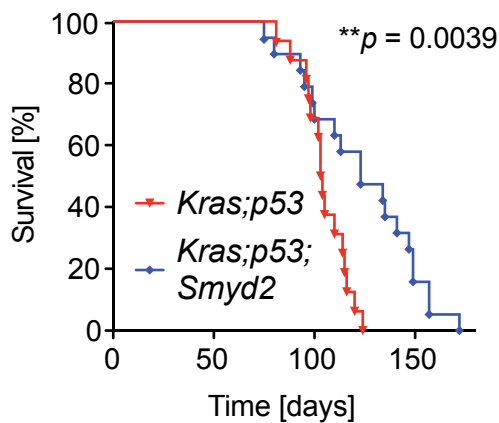



**A**

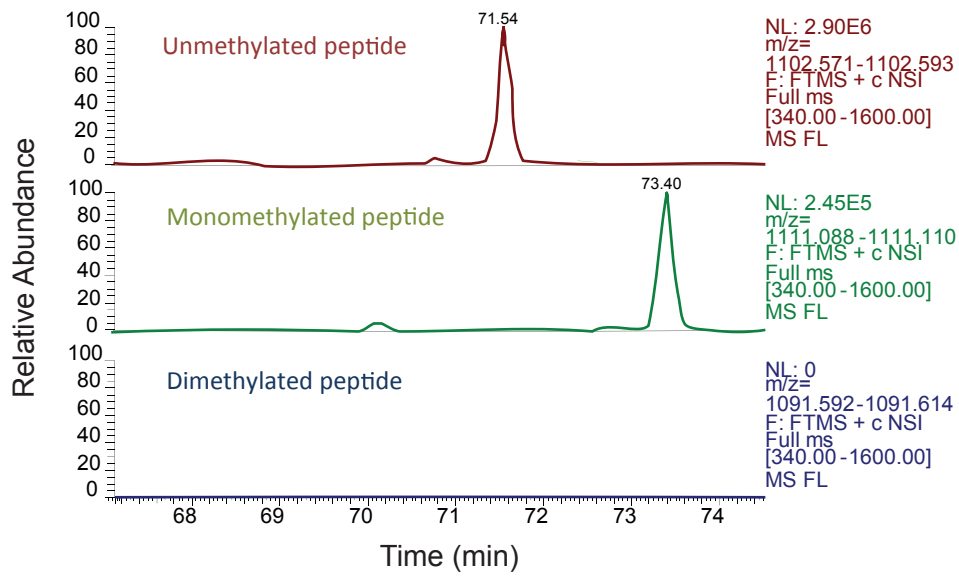

**B**

K355

MAPKAPK2 PLHTSRVLKEDKERWEDVKEEMTSALATMRVDYEQIKIKKIEDASNP LLLKRRKKARALE  
 MAPKAPK3 PLHTARVLQEDKDHWEVKEEMTSALATMRVDYDQVKIKDLKTSNNRLLNKRRKKQAGSS  
 MAPKAPK5 L--PSAQLMMDKAVVAGIQQAHAEQLANMRIQDLKVS LKPLHSVNNPILRKRKLLGTPKPK  
 : \* \*\* : : : : . \*\* . \*\* : : : : \* : . \* : \* \*\* :

**C**

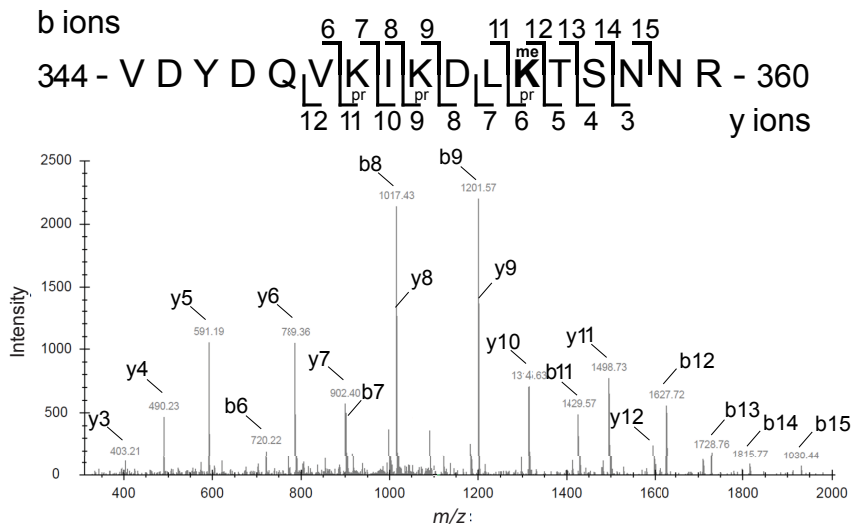

**D**

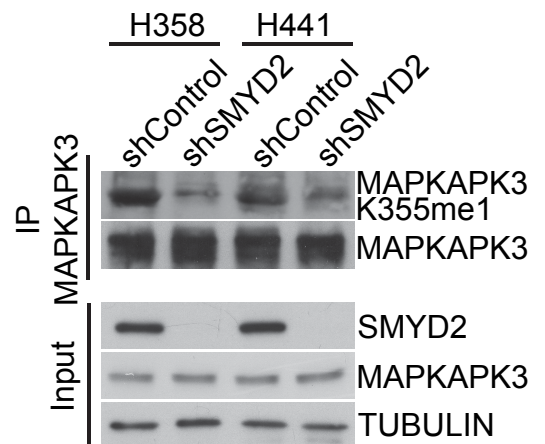

**A**

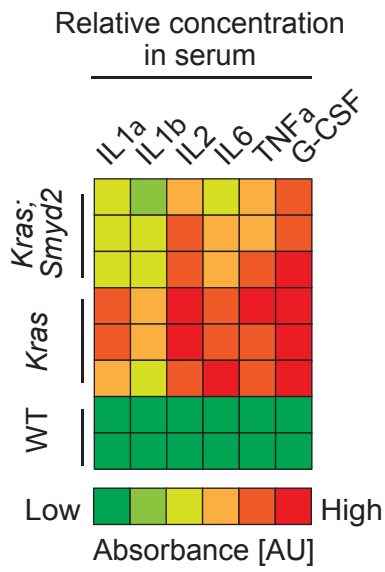

**B**

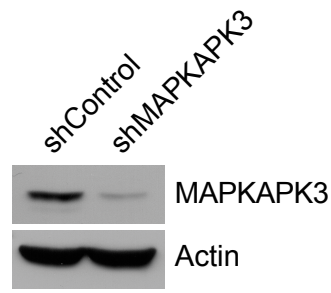

**C**

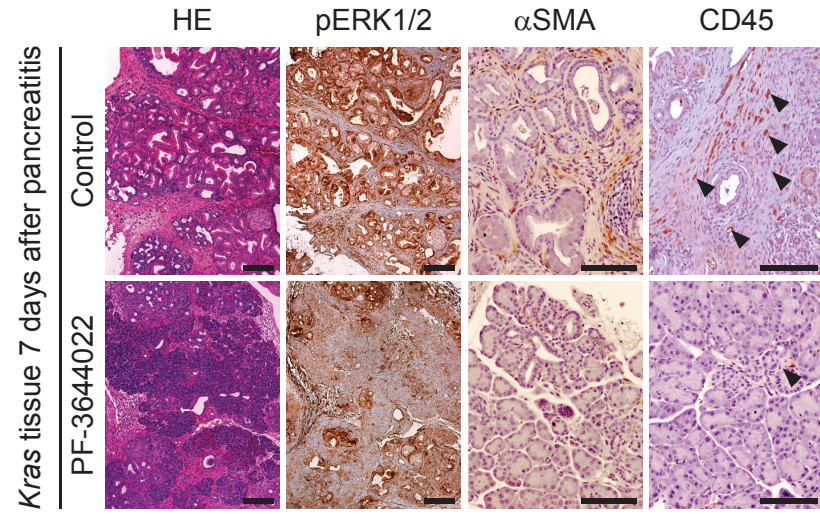

**D**

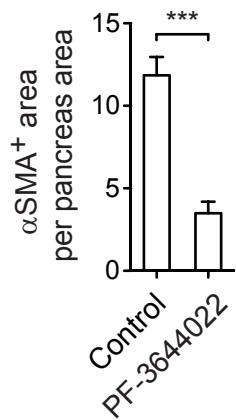

**E**

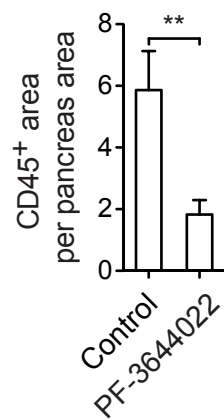

**F**

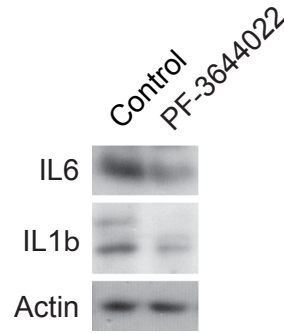

**G**

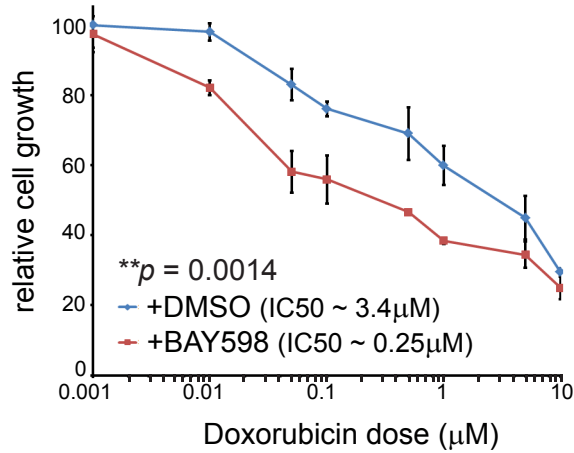

Supplement: supp_gad.275529.115_Supp_Figures.pdf [file supp_gad.275529.115_Supp_Figures.pdf]
