# Supplementary material for: Coordination of stress signals by the lysine methyltransferase SMYD2 promotes pancreatic cancer
Source: PubMed Central journal article supplement (PMC4826394; doi:10.1101/gad.275529.115), 2016-04-01
Supplement: supp_gad.275529.115_Supp_TableS1.pdf [file supp_gad.275529.115_Supp_TableS1.pdf]

## Reynoird\_Supplemental Table S1

List of potential SMYD2 substrate candidates detected on two independent radiolabeled protoarray methylation assays.

Each protein is spotted twice as a doublet on the protoarray. To be identified as a methylated candidate, the protein doublet has to be radiolabeled in both protoarrays. The internal replicates represent protein doublet spotted more than once on each individual protoarray.

|               | hits in both<br>protoarrays | hits in<br>protoarray 1 | internal<br>replicates<br>protoarray 1 | hits in<br>protoarray 2 | internal<br>replicates<br>protoarray 2 |
|---------------|-----------------------------|-------------------------|----------------------------------------|-------------------------|----------------------------------------|
| ADH4          | X                           | X                       | 1/1                                    | X                       | 1/1                                    |
| AGGF1         | X                           | X                       | 1/1                                    | X                       | 1/1                                    |
| AHI1          | X                           | X                       | 1/1                                    | X                       | 1/1                                    |
| ALK           | X                           | X                       | 1/1                                    | X                       | 1/1                                    |
| AMMECR1L      | X                           | X                       | 1/1                                    | X                       | 1/1                                    |
| ANKZF1        | X                           | X                       | 1/1                                    | X                       | 1/1                                    |
| APEX1         | X                           | X                       | 1/1                                    | X                       | 1/1                                    |
| APOBEC3C      | X                           | X                       | 1/1                                    | X                       | 1/1                                    |
| APTX          | X                           | X                       | 1/1                                    | X                       | 1/1                                    |
| ASAP          | X                           | X                       | 1/1                                    | X                       | 1/1                                    |
| ASXL1         | X                           | X                       | 1/1                                    | X                       | 1/1                                    |
| AURKA         | X                           | X                       | 1/1                                    | X                       | 1/1                                    |
| AURKB         | X                           | X                       | 1/1                                    | X                       | 1/1                                    |
| BBX           | X                           | X                       | 1/1                                    | X                       | 1/1                                    |
| BMX           | X                           | X                       | 3/3                                    | X                       | 2/3                                    |
| BTF3          | X                           | X                       | 1/1                                    | X                       | 1/1                                    |
| BUD31         | X                           | X                       | 1/1                                    | X                       | 1/1                                    |
| BYSL          | X                           | X                       | 2/2                                    | X                       | 2/2                                    |
| C11orf31      | X                           | X                       | 1/1                                    | X                       | 1/1                                    |
| C14orf111     | X                           | X                       | 1/1                                    | X                       | 1/1                                    |
| C17orf85      | X                           | X                       | 1/1                                    | X                       | 1/1                                    |
| C1orf116      | X                           | X                       | 1/1                                    | X                       | 1/1                                    |
| C1orf55       | X                           | X                       | 1/1                                    | X                       | 1/1                                    |
| C22orf33      | X                           | X                       | 1/1                                    | X                       | 1/1                                    |
| C6orf130      | X                           | X                       | 1/1                                    | X                       | 1/1                                    |
| C6orf166      | X                           | X                       | 1/1                                    | X                       | 1/1                                    |
| C8orf59       | X                           | X                       | 1/1                                    | X                       | 1/1                                    |
| C9orf32       | X                           | X                       | 1/1                                    | X                       | 1/1                                    |
| C9orf9        | X                           | X                       | 1/1                                    | X                       | 1/1                                    |
| CASK          | X                           | X                       | 1/1                                    | X                       | 1/1                                    |
| CCDC23        | X                           | X                       | 1/1                                    | X                       | 1/1                                    |
| CCDC55        | X                           | X                       | 1/1                                    | X                       | 1/1                                    |
| CCL19         | X                           | X                       | 1/1                                    | X                       | 1/1                                    |
| CDC7          | X                           | X                       | 1/1                                    | X                       | 1/1                                    |
| CDK5          | X                           | X                       | 2/2                                    | X                       | 2/2                                    |
| CDKL1         | X                           | X                       | 1/1                                    | X                       | 1/1                                    |
| CDKN2AIP      | X                           | X                       | 1/1                                    | X                       | 1/1                                    |
| CFDP1         | X                           | X                       | 1/1                                    | X                       | 1/1                                    |
| CORO6         | X                           | X                       | 1/1                                    | X                       | 1/1                                    |
| CSNK1G2       | X                           | X                       | 1/1                                    | X                       | 1/1                                    |
| CSNK2A2       | X                           | X                       | 1/1                                    | X                       | 1/1                                    |
| CT45A1        | X                           | X                       | 1/1                                    | X                       | 1/1                                    |
| CUTC          | X                           | X                       | 2/2                                    | X                       | 2/2                                    |
| DAPK3         | X                           | X                       | 1/1                                    | X                       | 1/1                                    |
| DCUN1D2       | X                           | X                       | 1/1                                    | X                       | 1/1                                    |
| DDX1          | X                           | X                       | 1/1                                    | X                       | 1/1                                    |
| DDX21         | X                           | X                       | 1/1                                    | X                       | 1/1                                    |
| DDX49         | X                           | X                       | 1/1                                    | X                       | 1/1                                    |
| DDX54         | X                           | X                       | 1/1                                    | X                       | 1/1                                    |
| DDX6          | X                           | X                       | 1/1                                    | X                       | 1/1                                    |
| DGCR8         | X                           | X                       | 1/1                                    | X                       | 1/1                                    |
| DKFZp761G2113 | X                           | X                       | 1/1                                    | X                       | 1/1                                    |
| DNAJB7        | X                           | X                       | 1/1                                    | X                       | 1/1                                    |
| DNAJC8        | X                           | X                       | 1/1                                    | X                       | 1/1                                    |
| DNTT          | X                           | X                       | 1/1                                    | X                       | 1/1                                    |
| EDF1          | X                           | X                       | 1/1                                    | X                       | 1/1                                    |
| EFS           | X                           | X                       | 1/1                                    | X                       | 1/1                                    |
| EHHADH        | X                           | X                       | 1/1                                    | X                       | 1/1                                    |
| ELOF1         | X                           | X                       | 1/1                                    | X                       | 1/1                                    |
| EPB41L4A      | X                           | X                       | 1/1                                    | X                       | 1/1                                    |
| FAM116B       | X                           | X                       | 1/1                                    | X                       | 1/1                                    |
| FAM128A       | X                           | X                       | 1/1                                    | X                       | 1/1                                    |
| FAM131B       | X                           | X                       | 1/1                                    | X                       | 1/1                                    |
| FAU           | X                           | X                       | 1/1                                    | X                       | 1/1                                    |

|           |   |   |     |   |     |
|-----------|---|---|-----|---|-----|
| FGD2      | X | X | 1/1 | X | 1/1 |
| FGF12     | X | X | 3/3 | X | 2/3 |
| FLJ11184  | X | X | 1/1 | X | 1/1 |
| FSD1      | X | X | 1/1 | X | 1/1 |
| GABARAP   | X | X | 1/1 | X | 1/1 |
| GABARAPL2 | X | X | 1/1 | X | 1/1 |
| GAS2L3    | X | X | 1/1 | X | 1/1 |
| GCC1      | X | X | 1/1 | X | 1/1 |
| GLIPR2    | X | X | 1/1 | X | 1/1 |
| GTPBP10   | X | X | 1/1 | X | 1/1 |
| HIST1H2BD | X | X | 1/1 | X | 1/1 |
| HMGN1     | X | X | 2/2 | X | 2/2 |
| HMGN3     | X | X | 1/1 | X | 1/1 |
| HNRPA1    | X | X | 1/1 | X | 1/1 |
| HP1BP3    | X | X | 1/1 | X | 1/1 |
| HSP90AA1  | X | X | 1/1 | X | 1/1 |
| IFIT5     | X | X | 1/1 | X | 1/1 |
| IL21      | X | X | 1/1 | X | 1/1 |
| IMPACT    | X | X | 1/1 | X | 1/1 |
| INSR      | X | X | 1/1 | X | 1/1 |
| JMJD2D    | X | X | 1/1 | X | 1/1 |
| KCTD18    | X | X | 2/2 | X | 2/2 |
| KIAA0515  | X | X | 1/1 | X | 1/1 |
| KIAA1530  | X | X | 1/1 | X | 1/1 |
| KPNA2     | X | X | 2/2 | X | 2/2 |
| LOC153684 | X | X | 1/1 | X | 1/1 |
| LOC57228  | X | X | 1/1 | X | 1/1 |
| LRRC6     | X | X | 1/1 | X | 1/1 |
| LSM4      | X | X | 1/1 | X | 1/1 |
| MAP2      | X | X | 1/1 | X | 1/1 |
| MAPKAPK3  | X | X | 1/1 | X | 1/1 |
| MCM10     | X | X | 1/1 | X | 1/1 |
| METAP2    | X | X | 1/1 | X | 1/1 |
| MPP7      | X | X | 1/1 | X | 1/1 |
| MYLK      | X | X | 1/1 | X | 1/1 |
| NEK7      | X | X | 1/1 | X | 1/1 |
| NKRF      | X | X | 1/1 | X | 1/1 |
| NOL7      | X | X | 1/1 | X | 1/1 |
| PAK4      | X | X | 1/1 | X | 1/1 |
| PDAP1     | X | X | 1/1 | X | 1/1 |
| PHF20L1   | X | X | 1/1 | X | 1/1 |
| PIN4      | X | X | 1/1 | X | 1/1 |
| PLK1      | X | X | 1/1 | X | 1/1 |
| PRC1      | X | X | 1/1 | X | 1/1 |
| PRKAA2    | X | X | 1/1 | X | 1/1 |
| PRKAG2    | X | X | 1/1 | X | 1/1 |
| PRKRA     | X | X | 1/1 | X | 1/1 |
| PRR15     | X | X | 1/1 | X | 1/1 |
| PSMD4     | X | X | 1/1 | X | 1/1 |
| PSRC1     | X | X | 1/1 | X | 1/1 |
| PTPN6     | X | X | 1/1 | X | 1/1 |
| PUS7L     | X | X | 1/1 | X | 1/1 |
| RABL3     | X | X | 1/1 | X | 1/1 |
| RDBP      | X | X | 1/1 | X | 1/1 |
| RECQL     | X | X | 1/1 | X | 1/1 |
| RIT1      | X | X | 1/1 | X | 1/1 |
| RIT2      | X | X | 2/2 | X | 2/2 |
| RP13      | X | X | 1/1 | X | 1/1 |
| RPL22     | X | X | 1/1 | X | 1/1 |
| RPL23A    | X | X | 1/1 | X | 1/1 |
| RPL29     | X | X | 1/1 | X | 1/1 |
| RPS25     | X | X | 1/1 | X | 1/1 |
| RPS27L    | X | X | 1/1 | X | 1/1 |
| RPS28     | X | X | 1/1 | X | 1/1 |
| RSBN1L    | X | X | 1/1 | X | 1/1 |
| RTF1      | X | X | 1/1 | X | 1/1 |
| RTN4      | X | X | 1/1 | X | 1/1 |
| SCEL      | X | X | 1/1 | X | 1/1 |
| SELS      | X | X | 1/1 | X | 1/1 |
| SERBP1    | X | X | 1/1 | X | 1/1 |
| SFRS1     | X | X | 1/1 | X | 1/1 |
| SFRS2     | X | X | 1/1 | X | 1/1 |
| SFRS5     | X | X | 1/1 | X | 1/1 |
| SNRPA1    | X | X | 2/2 | X | 2/2 |
| SPANXN4   | X | X | 1/1 | X | 1/1 |

|           |   |   |     |   |     |
|-----------|---|---|-----|---|-----|
| SPRR4     | X | X | 1/1 | X | 1/1 |
| SRP19     | X | X | 2/2 | X | 1/2 |
| STK6      | X | X | 1/1 | X | 1/1 |
| SUDS3     | X | X | 1/1 | X | 1/1 |
| SURF2     | X | X | 1/1 | X | 1/1 |
| SYTL2     | X | X | 1/1 | X | 1/1 |
| TARBP2    | X | X | 1/1 | X | 1/1 |
| TBC1D22B  | X | X | 1/1 | X | 1/1 |
| TCEA1     | X | X | 1/1 | X | 1/1 |
| TCEAL1    | X | X | 1/1 | X | 1/1 |
| TP53I13   | X | X | 1/1 | X | 1/1 |
| TTK       | X | X | 1/1 | X | 1/1 |
| UBD       | X | X | 2/2 | X | 2/2 |
| UBE2E2    | X | X | 1/1 | X | 1/1 |
| UBE2S     | X | X | 1/1 | X | 1/1 |
| UBXD3     | X | X | 1/1 | X | 1/1 |
| UTP14A    | X | X | 1/1 | X | 1/1 |
| VAMP4     | X | X | 2/2 | X | 2/2 |
| VRK1      | X | X | 1/1 | X | 1/1 |
| WDR5      | X | X | 1/1 | X | 1/1 |
| 6CKINE    |   |   | 0/1 | X | 1/1 |
| ABCF1     |   | X | 1/1 |   | 0/1 |
| ADAM22    |   | X | 1/1 |   | 0/1 |
| ADD2      |   |   | 0/1 | X | 1/1 |
| AFF4      |   | X | 1/1 |   | 1/1 |
| ALKBH3    |   | X | 1/1 |   | 0/1 |
| ANK1      |   | X | 1/1 |   | 0/1 |
| ARHGEF5   |   |   | 0/1 | X | 1/1 |
| ARL6IP4   |   |   | 0/1 | X | 1/1 |
| ARPC1B    |   |   | 0/1 | X | 1/1 |
| ATP6AP2   |   | X | 1/1 |   | 0/1 |
| BAZ2B     |   |   | 0/1 | X | 1/1 |
| BCKDK     |   |   | 0/1 | X | 1/1 |
| BCL7B     |   |   | 0/1 | X | 1/1 |
| BCL7C     |   |   | 0/1 | X | 1/1 |
| BRDG1     |   |   | 0/1 | X | 1/1 |
| C10orf63  |   | X | 1/1 |   | 0/1 |
| C11orf57  |   | X | 1/1 |   | 0/1 |
| C11orf75  |   | X | 1/1 |   | 0/1 |
| C12orf31  |   | X | 1/1 |   | 0/1 |
| C12orf52  |   | X | 1/1 |   | 0/1 |
| C14orf106 |   | X | 1/1 |   | 0/1 |
| C14orf111 |   |   | 0/1 | X | 1/1 |
| C16orf78  |   | X | 1/1 |   | 0/1 |
| C17orf64  |   | X | 1/1 |   | 0/1 |
| C19orf43  |   | X | 1/1 |   | 0/1 |
| C1orf174  |   | X | 1/1 |   | 0/1 |
| C1orf35   |   | X | 1/1 |   | 0/1 |
| C1orf64   |   | X | 1/1 |   | 0/1 |
| C21orf7   |   | X | 1/1 |   | 0/1 |
| C6orf201  |   |   | 0/1 | X | 1/1 |
| C8orf70   |   | X | 1/1 |   | 0/1 |
| C9orf19   |   | X | 1/1 |   | 0/1 |
| CAMK2B    |   | X | 1/1 |   | 0/1 |
| CBX5      |   | X | 1/1 |   | 0/1 |
| CCDC28A   |   | X | 1/1 |   | 0/1 |
| CCDC5     |   | X | 1/1 |   | 0/1 |
| CCDC72    |   | X | 1/1 |   | 0/1 |
| CCDC75    |   | X | 1/1 |   | 0/1 |
| CCNB3     |   | X | 1/1 |   | 0/1 |
| CDC2      |   |   | 0/1 | X | 1/1 |
| CDCA3     |   | X | 1/1 |   | 0/1 |
| CDKL3     |   |   | 0/1 | X | 1/1 |
| CENPQ     |   | X | 1/1 |   | 0/1 |
| CGI       |   |   | 0/1 | X | 1/1 |
| CHEK2     |   |   | 0/1 | X | 1/1 |
| CHMP2B    |   |   | 0/1 | X | 1/1 |
| CKAP2     |   | X | 1/1 |   | 0/1 |
| CLIC5     |   |   | 0/1 | X | 1/1 |
| COPS5     |   |   | 0/1 | X | 1/1 |
| CSAG1     |   | X | 1/1 |   | 0/1 |
| CSAG3A    |   |   | 0/1 | X | 1/1 |
| CSF1R     |   | X | 1/1 |   | 0/1 |
| CSNK1G1   |   |   | 0/1 | X | 1/1 |
| CSNK2A1   |   | X | 2/2 |   | 0/2 |

|           |  |   |     |   |     |
|-----------|--|---|-----|---|-----|
| CTNND1    |  |   | 0/1 | X | 1/1 |
| CUEDC1    |  | X | 1/1 |   | 0/1 |
| CXorf56   |  | X | 1/1 |   | 0/1 |
| DCX       |  |   | 0/1 | X | 1/1 |
| DCX       |  |   | 0/1 | X | 1/1 |
| DDX55     |  |   | 0/1 | X | 1/1 |
| DIMT1L    |  | X | 1/1 |   | 0/1 |
| DNALI1    |  | X | 1/1 |   | 0/1 |
| EDN3      |  | X | 1/1 |   | 0/1 |
| EIF1AX    |  | X | 1/1 |   | 0/1 |
| EIF1AY    |  |   | 0/1 | X | 1/1 |
| EIF2A     |  |   | 0/1 | X | 1/1 |
| EIF2S2    |  | X | 1/1 |   | 0/1 |
| EPHA3     |  |   | 0/1 | X | 1/1 |
| FAM122A   |  | X | 1/1 |   | 0/1 |
| FAM128B   |  | X | 1/1 |   | 0/1 |
| FAM130A2  |  |   | 0/1 | X | 1/1 |
| FAM21C    |  |   | 0/1 | X | 1/1 |
| FAM50A    |  | X | 1/1 |   | 0/1 |
| FAM54A    |  |   | 0/1 | X | 1/1 |
| FEN1      |  | X | 1/1 |   | 0/1 |
| FGF16     |  | X | 1/1 |   | 0/1 |
| FGFR10P   |  | X | 1/1 |   | 0/1 |
| FKBP3     |  | X | 1/1 |   | 0/1 |
| GABARAPL1 |  |   | 0/1 | X | 1/1 |
| GMNN      |  | X | 1/1 |   | 0/1 |
| GNL2      |  | X | 1/1 |   | 0/1 |
| GOSR1     |  | X | 1/1 |   | 0/1 |
| GSK3B     |  | X | 1/1 |   | 0/1 |
| GTF2E2    |  | X | 1/1 |   | 0/1 |
| HADH      |  |   | 0/1 | X | 1/1 |
| HDGFRP3   |  |   | 0/1 | X | 1/1 |
| HIST2H2AC |  | X | 1/1 |   | 0/1 |
| HMGB2     |  | X | 1/1 |   | 0/1 |
| HSD3B2    |  | X | 1/1 |   | 0/1 |
| HSPC111   |  | X | 1/1 |   | 0/1 |
| HSPC148   |  | X | 1/1 |   | 0/1 |
| IL20      |  |   | 0/1 | X | 1/1 |
| IPPK      |  |   | 0/1 | X | 1/1 |
| ISG20     |  | X | 1/1 |   | 0/1 |
| ITAC      |  |   | 0/1 | X | 1/1 |
| KCNAB1    |  |   | 0/1 | X | 1/1 |
| KCNAB2    |  | X | 1/1 |   | 0/1 |
| KIAA0020  |  |   | 0/1 | X | 1/1 |
| KIAA0859  |  |   | 0/1 | X | 1/1 |
| KIF3A     |  |   | 0/1 | X | 1/1 |
| KIF3B     |  |   | 0/1 | X | 1/1 |
| KRR1      |  | X | 1/1 |   | 0/1 |
| LAD1      |  |   | 0/1 | X | 1/1 |
| LAMC1     |  |   | 0/1 | X | 1/1 |
| LARP1     |  |   | 0/1 | X | 1/1 |
| LENG1     |  | X | 1/1 |   | 0/1 |
| LETM2     |  | X | 1/1 |   | 0/1 |
| LIMS2     |  |   | 0/1 | X | 1/1 |
| LMOD1     |  | X | 2/2 |   | 0/2 |
| LOC285927 |  | X | 1/1 |   | 0/1 |
| LOC389415 |  |   | 0/1 | X | 1/1 |
| LOC401068 |  |   | 0/1 | X | 1/1 |
| LRRC20    |  | X | 1/1 |   | 0/1 |
| MAP3K2    |  |   | 0/1 | X | 1/1 |
| MCM2      |  |   | 0/1 | X | 1/1 |
| METTL1    |  | X | 1/1 |   | 0/1 |
| MGC17403  |  | X | 1/1 |   | 0/1 |
| NCAPG     |  | X | 1/1 |   | 0/1 |
| NEIL1     |  | X | 1/1 |   | 0/1 |
| NIP30     |  | X | 1/1 |   | 0/1 |
| NOLC1     |  | X | 1/1 |   | 0/1 |
| NOSTRIN   |  |   | 0/1 | X | 1/1 |
| NUAK1     |  | X | 1/1 |   | 0/1 |
| NUSAP1    |  | X | 1/1 |   | 0/1 |
| ODF2      |  |   | 0/1 | X | 1/1 |
| PCDHGA5   |  | X | 1/1 |   | 0/1 |
| PCLO      |  |   | 0/1 | X | 1/1 |
| PCMT1     |  |   | 0/1 | X | 1/1 |
| PCMT1     |  |   | 0/1 | X | 1/1 |

|          |  |   |     |   |     |
|----------|--|---|-----|---|-----|
| PIP5K2C  |  |   | 0/1 | X | 1/1 |
| PLEKHA1  |  | X | 1/1 |   | 0/1 |
| PMP2     |  | X | 1/1 |   | 0/1 |
| POLB     |  |   | 0/1 | X | 1/1 |
| PPAN     |  |   | 0/1 | X | 1/1 |
| PPHLN1   |  | X | 1/1 |   | 0/1 |
| PRR16    |  |   | 0/1 | X | 1/1 |
| PRRC1    |  | X | 1/1 |   | 0/1 |
| PSMG1    |  | X | 1/1 |   | 0/1 |
| PTCD2    |  | X | 1/1 |   | 0/1 |
| PTHLH    |  | X | 1/1 |   | 0/1 |
| PTRH1    |  |   | 0/1 | X | 1/1 |
| PWWP2B   |  | X | 1/1 |   | 0/1 |
| RAB35    |  | X | 1/1 |   | 0/1 |
| RAC1     |  |   | 0/1 | X | 1/1 |
| RAD51AP1 |  |   | 0/1 | X | 1/1 |
| RBM34    |  | X | 1/1 |   | 0/1 |
| RCOR3    |  | X | 1/1 |   | 0/1 |
| RG9MTD1  |  |   | 0/1 | X | 1/1 |
| RGS3     |  | X | 1/1 |   | 0/1 |
| RNF32    |  | X | 1/1 |   | 0/1 |
| RNF4     |  | X | 1/1 |   | 0/1 |
| RPL11    |  |   | 0/1 | X | 1/1 |
| RPL30    |  |   | 0/1 | X | 1/1 |
| RPL31    |  |   | 0/1 | X | 1/1 |
| RPL39L   |  |   | 0/1 | X | 1/1 |
| RPS19    |  |   | 0/1 | X | 1/1 |
| RPS20    |  |   | 0/1 | X | 1/1 |
| RSU1     |  | X | 1/1 |   | 0/1 |
| SFRS2B   |  | X | 1/1 |   | 0/1 |
| SFRS6    |  |   | 0/1 | X | 1/1 |
| SFRS9    |  | X | 1/1 |   | 0/1 |
| SH3YL1   |  | X | 1/1 |   | 0/1 |
| SIP1     |  | X | 1/1 |   | 0/1 |
| SIRT6    |  |   | 0/1 | X | 1/1 |
| SLAIN2   |  |   | 0/1 | X | 1/1 |
| SMTNL2   |  | X | 1/1 |   | 0/1 |
| SNAP25   |  | X | 1/1 |   | 0/1 |
| SPANXB1  |  | X | 1/1 |   | 0/1 |
| SSH3     |  |   | 0/1 | X | 1/1 |
| STAT6    |  |   | 0/1 | X | 1/1 |
| SUHW2    |  | X | 1/1 |   | 0/1 |
| SUPT16H  |  | X | 1/1 |   | 0/1 |
| SUPT16H  |  |   | 0/1 | X | 1/1 |
| TAF1B    |  | X | 1/1 |   | 0/1 |
| TBPL1    |  | X | 1/1 |   | 0/1 |
| TBRG1    |  | X | 1/1 |   | 0/1 |
| THEX1    |  |   | 0/1 | X | 1/1 |
| TNIK     |  |   | 0/1 | X | 1/1 |
| TOB2     |  | X | 1/1 |   | 0/1 |
| TPT1     |  |   | 0/1 | X | 1/1 |
| TRA2A    |  |   | 0/1 | X | 1/1 |
| TRAPPC2  |  | X | 1/1 |   | 0/1 |
| TRIM41   |  |   | 0/1 | X | 1/1 |
| TRIT1    |  |   | 0/1 | X | 1/1 |
| TTLL1    |  |   | 0/1 | X | 1/1 |
| TTLL7    |  | X | 1/1 |   | 0/1 |
| UFD1L    |  |   | 0/1 | X | 1/1 |
| UNKL     |  |   | 0/1 | X | 1/1 |
| VCY      |  |   | 0/1 | X | 1/1 |
| WHSC1    |  |   | 0/1 | X | 1/1 |
| WIT1     |  | X | 1/1 |   | 0/1 |
| XAF1     |  |   | 0/1 | X | 1/1 |
| YY1      |  | X | 1/1 |   | 0/1 |
| ZC3H3    |  |   | 0/1 | X | 1/1 |
| ZMYND11  |  |   | 0/1 | X | 1/1 |
| ZNF239   |  | X | 1/1 |   | 0/1 |
| ZNF323   |  |   | 0/1 | X | 1/1 |
